# Supplementary material for: ABSSeq: a new RNA-Seq analysis method based on modelling absolute expression differences
Source: PubMed Central journal article supplement (PMC4973090; doi:10.1186/s12864-016-2848-2), 2016-08-04
Supplement: 12864_2016_2848_MOESM2_ESM.pdf [file 12864_2016_2848_MOESM2_ESM.pdf]

**Table S1. Multiple comparisons of type I error performance of all methods**

| Paired comparison   | Tukey multiple comparisons of Means |          |          |          |          |          | Wilcoxon tests       |
|---------------------|-------------------------------------|----------|----------|----------|----------|----------|----------------------|
|                     | NB                                  |          |          | R        |          |          | Modencodfly data set |
|                     | N=2                                 | N=5      | N=10     | N=2      | N=5      | N=10     |                      |
|                     | p adj                               | p adj    | p adj    | p adj    | p adj    | p adj    | p adj                |
| DESeq-ABSSeq        | 0.00E+00                            | 0.00E+00 | 0.00E+00 | 0.00E+00 | 0.00E+00 | 0.00E+00 | 2.21E-10             |
| DESeq2-ABSSeq       | 0.00E+00                            | 0.00E+00 | 0.00E+00 | 0.00E+00 | 0.00E+00 | 0.00E+00 | 3.34E-03             |
| edgeR-ABSSeq        | 0.00E+00                            | 0.00E+00 | 0.00E+00 | 0.00E+00 | 0.00E+00 | 0.00E+00 | 2.21E-10             |
| Voom-ABSSeq         | 0.00E+00                            | 0.00E+00 | 0.00E+00 | 0.00E+00 | 0.00E+00 | 0.00E+00 | 2.21E-10             |
| DESeq2-DESeq        | 0.00E+00                            | 0.00E+00 | 0.00E+00 | 5.11E-05 | 9.81E-01 | 0.00E+00 | 2.08E-05             |
| edgeR-DESeq         | 0.00E+00                            | 0.00E+00 | 0.00E+00 | 8.51E-01 | 0.00E+00 | 0.00E+00 | 9.19E-02             |
| Voom-DESeq          | 1.70E-06                            | 0.00E+00 | 0.00E+00 | 0.00E+00 | 0.00E+00 | 0.00E+00 | 3.32E-03             |
| edgeR-DESeq2        | 1.00E+00                            | 0.00E+00 | 0.00E+00 | 0.00E+00 | 0.00E+00 | 0.00E+00 | 5.56E-07             |
| Voom-DESeq2         | 3.80E-06                            | 0.00E+00 | 6.93E-02 | 0.00E+00 | 0.00E+00 | 0.00E+00 | 2.21E-08             |
| Voom-edgeR          | 4.20E-06                            | 1.81E-04 | 0.00E+00 | 0.00E+00 | 0.00E+00 | 0.00E+00 | 9.19E-02             |
| edgeR-robust-edgeR  | /                                   | /        | /        | 0.00E+00 | 0.00E+00 | 1.97E-02 | /                    |
| edgeR-robust-ABSSeq | /                                   | /        | /        | 0.00E+00 | 0.00E+00 | 0.00E+00 | /                    |
| edgeR-robust-Voom   | /                                   | /        | /        | 0.00E+00 | 0.00E+00 | 0.00E+00 | /                    |
| edgeR-robust-DESeq  | /                                   | /        | /        | 0.00E+00 | 0.00E+00 | 0.00E+00 | /                    |
| edgeR-robust-DESeq2 | /                                   | /        | /        | 0.00E+00 | 0.00E+00 | 0.00E+00 | /                    |

\* edgeR-robust was only applied on data sets that contain outliers (indicated by R)

**Table S2. Tukey's multiple comparisons of means for AUCs**

| Paired comparison   | Tukey multiple comparisons of Means |          |          |          |          |          |
|---------------------|-------------------------------------|----------|----------|----------|----------|----------|
|                     | NB                                  |          |          | R        |          |          |
|                     | N=2                                 | N=5      | N=10     | N=2      | N=5      | N=10     |
|                     | p adj                               | p adj    | p adj    | p adj    | p adj    | p adj    |
| EBSeq-ABSSeq        | 0.00E+00                            | 0.00E+00 | 2.62E-02 | 0.00E+00 | 0.00E+00 | 0.00E+00 |
| baySeq-ABSSeq       | 8.73E-01                            | 9.08E-01 | 5.58E-02 | 9.99E-01 | 0.00E+00 | 0.00E+00 |
| DESeq-ABSSeq        | 1.00E+00                            | 9.98E-01 | 7.86E-01 | 1.30E-04 | 0.00E+00 | 0.00E+00 |
| DESeq2-ABSSeq       | 0.00E+00                            | 0.00E+00 | 0.00E+00 | 1.00E-03 | 0.00E+00 | 0.00E+00 |
| edgeR-ABSSeq        | 1.00E+00                            | 9.98E-01 | 1.00E+00 | 2.65E-02 | 0.00E+00 | 0.00E+00 |
| edgeR-robust-ABSSeq | /                                   | /        | /        | 1.00E+00 | 0.00E+00 | 0.00E+00 |
| Voom-ABSSeq         | 9.96E-01                            | 3.05E-02 | 0.00E+00 | 9.68E-01 | 0.00E+00 | 0.00E+00 |
| EBSeq-baySeq        | 0.00E+00                            | 6.11E-03 | 1.00E+00 | 0.00E+00 | 4.71E-01 | 0.00E+00 |
| DESeq-baySeq        | 9.15E-01                            | 9.97E-01 | 6.97E-01 | 7.05E-04 | 0.00E+00 | 9.81E-01 |
| DESeq2-baySeq       | 3.90E-06                            | 0.00E+00 | 4.10E-06 | 4.77E-03 | 0.00E+00 | 0.00E+00 |
| edgeR-baySeq        | 7.76E-01                            | 6.09E-01 | 1.08E-01 | 8.94E-02 | 9.50E-02 | 8.78E-04 |
| edgeR-robust-baySeq | /                                   | /        | /        | 9.99E-01 | 1.00E+00 | 9.70E-04 |
| Voom-baySeq         | 9.95E-01                            | 3.79E-01 | 3.08E-03 | 9.99E-01 | 0.00E+00 | 0.00E+00 |
| EBSeq-DESeq         | 0.00E+00                            | 8.58E-04 | 5.13E-01 | 2.25E-01 | 0.00E+00 | 0.00E+00 |
| DESeq2-DESeq        | 0.00E+00                            | 0.00E+00 | 0.00E+00 | 9.99E-01 | 9.12E-01 | 0.00E+00 |
| edgeR-DESeq         | 1.00E+00                            | 9.21E-01 | 9.09E-01 | 7.58E-01 | 1.00E-07 | 2.60E-05 |
| edgeR-robust-DESeq  | /                                   | /        | /        | 1.05E-04 | 0.00E+00 | 2.90E-05 |
| Voom-DESeq          | 9.99E-01                            | 1.21E-01 | 1.12E-05 | 4.93E-03 | 0.00E+00 | 0.00E+00 |
| EBSeq-DESeq2        | 1.40E-06                            | 1.00E-07 | 1.22E-05 | 6.34E-02 | 0.00E+00 | 0.00E+00 |
| edgeR-DESeq2        | 0.00E+00                            | 0.00E+00 | 0.00E+00 | 9.69E-01 | 0.00E+00 | 0.00E+00 |
| edgeR-robust-DESeq2 | /                                   | /        | /        | 8.19E-04 | 0.00E+00 | 0.00E+00 |
| Voom-DESeq2         | 3.00E-07                            | 0.00E+00 | 5.28E-01 | 2.72E-02 | 0.00E+00 | 0.00E+00 |
| EBSeq-edgeR         | 0.00E+00                            | 1.50E-05 | 5.42E-02 | 3.02E-03 | 1.53E-04 | 9.49E-02 |
| edgeR-robust-edgeR  | /                                   | /        | /        | 2.25E-02 | 3.01E-02 | 1.00E+00 |
| EBSeq-edgeR-robust  | /                                   | /        | /        | 0.00E+00 | 7.57E-01 | 8.86E-02 |
| EBSeq-Voom          | 0.00E+00                            | 6.15E-01 | 7.57E-03 | 4.00E-07 | 0.00E+00 | 0.00E+00 |
| Voom-edgeR          | 9.84E-01                            | 5.94E-03 | 1.00E-07 | 2.97E-01 | 0.00E+00 | 0.00E+00 |
| Voom-edgeR-robust   | /                                   | /        | /        | 9.57E-01 | 0.00E+00 | 0.00E+00 |

\* edgeR-robust was only applied on data sets that contain outliers (indicated by R)
